# Supplementary material for: Vertical profiles of submicron aerosol single scattering albedo over the Indian region immediately before monsoon onset and during its development: research from the SWAAMI field campaign
Source: Copernicus journal article supplement (doi:10.5194/acp-20-4031-2020), 2020-04-02
Supplement: Supplementary file 1 [file acp-20-4031-2020-supplement.pdf]

Supplement of Atmos. Chem. Phys., 20, 4031–4046, 2020  
<https://doi.org/10.5194/acp-20-4031-2020-supplement>  
© Author(s) 2020. This work is distributed under  
the Creative Commons Attribution 4.0 License.

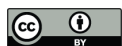

*Supplement of*

**Vertical profiles of submicron aerosol single scattering albedo over the Indian region immediately before monsoon onset and during its development: research from the SWAAMI field campaign**

**Mohanan R. Manoj et al.**

*Correspondence to:* Mohanan R. Manoj (manojshibika@gmail.com)

The copyright of individual parts of the supplement might differ from the CC BY 4.0 License.

## Supplementary Material

| TRACK | DATE                  | Phase | Region Covered    |
|-------|-----------------------|-------|-------------------|
| B956  | 11 <sup>th</sup> June | 1     | Jaipur            |
| B957  | 12 <sup>th</sup> June | 1     | Bhubaneswar       |
| B958  | 13 <sup>th</sup> June | 1     | Nagpur, Bengaluru |
| B959  | 21 <sup>st</sup> June | 2     | Arabian Sea       |
| B960  | 22 <sup>nd</sup> June | 2     | Bay of Bengal     |
| B961  | 23 <sup>rd</sup> June | 2     | Arabian Sea       |
| B962  | 23 <sup>rd</sup> June | 2     | Arabian Sea       |
| B963  | 25 <sup>th</sup> June | 2     | Arabian Sea       |
| B964  | 26 <sup>th</sup> June | 2     | Arabian Sea       |
| B965  | 26 <sup>th</sup> June | 2     | Arabian Sea       |
| B966  | 27 <sup>th</sup> June | 2     | Bay of Bengal     |
| B967  | 28 <sup>th</sup> June | 2     | Nagpur, Lucknow   |
| B968  | 30 <sup>th</sup> June | 2     | Jaipur            |
| B969  | 2 <sup>nd</sup> July  | 3     | Jaipur            |
| B970  | 3 <sup>rd</sup> July  | 3     | Jaipur            |
| B971  | 4 <sup>th</sup> July  | 3     | Bhubaneswar       |
| B972  | 5 <sup>th</sup> July  | 3     | Jaipur            |
| B973  | 6 <sup>th</sup> July  | 3     | Jaipur            |
| B974  | 7 <sup>th</sup> July  | 3     | Ahmedabad         |
| B975  | 9 <sup>th</sup> July  | 3     | Bhubaneswar       |
| B976  | 10 <sup>th</sup> July | 3     | Jaipur            |
| B977  | 11 <sup>th</sup> July | 3     | Kachhla           |

**Table S1. Details of the aircraft measurements**

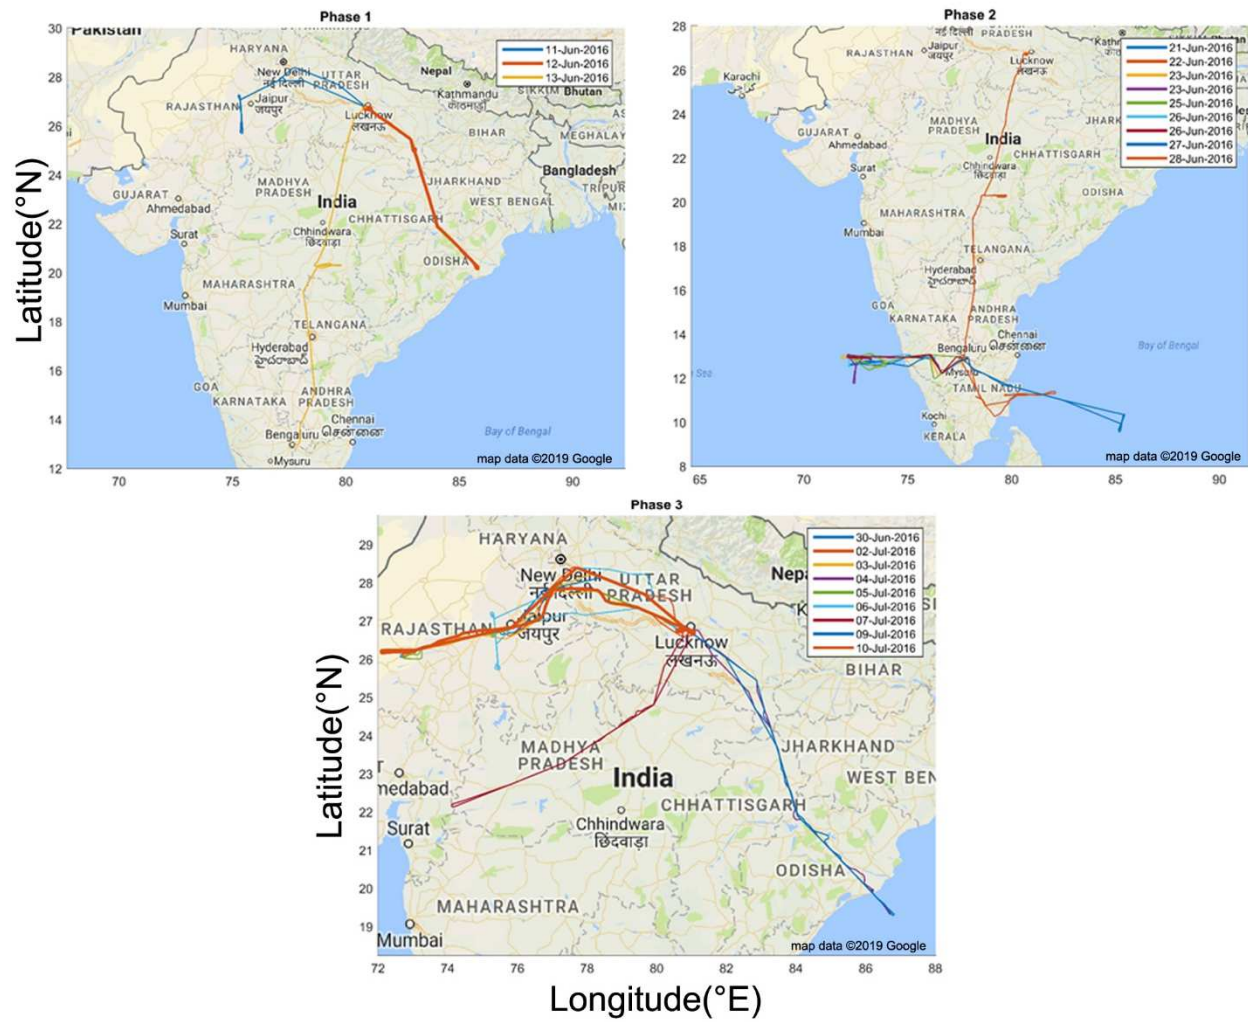

Figure S1. Detailed flight track during the three phases

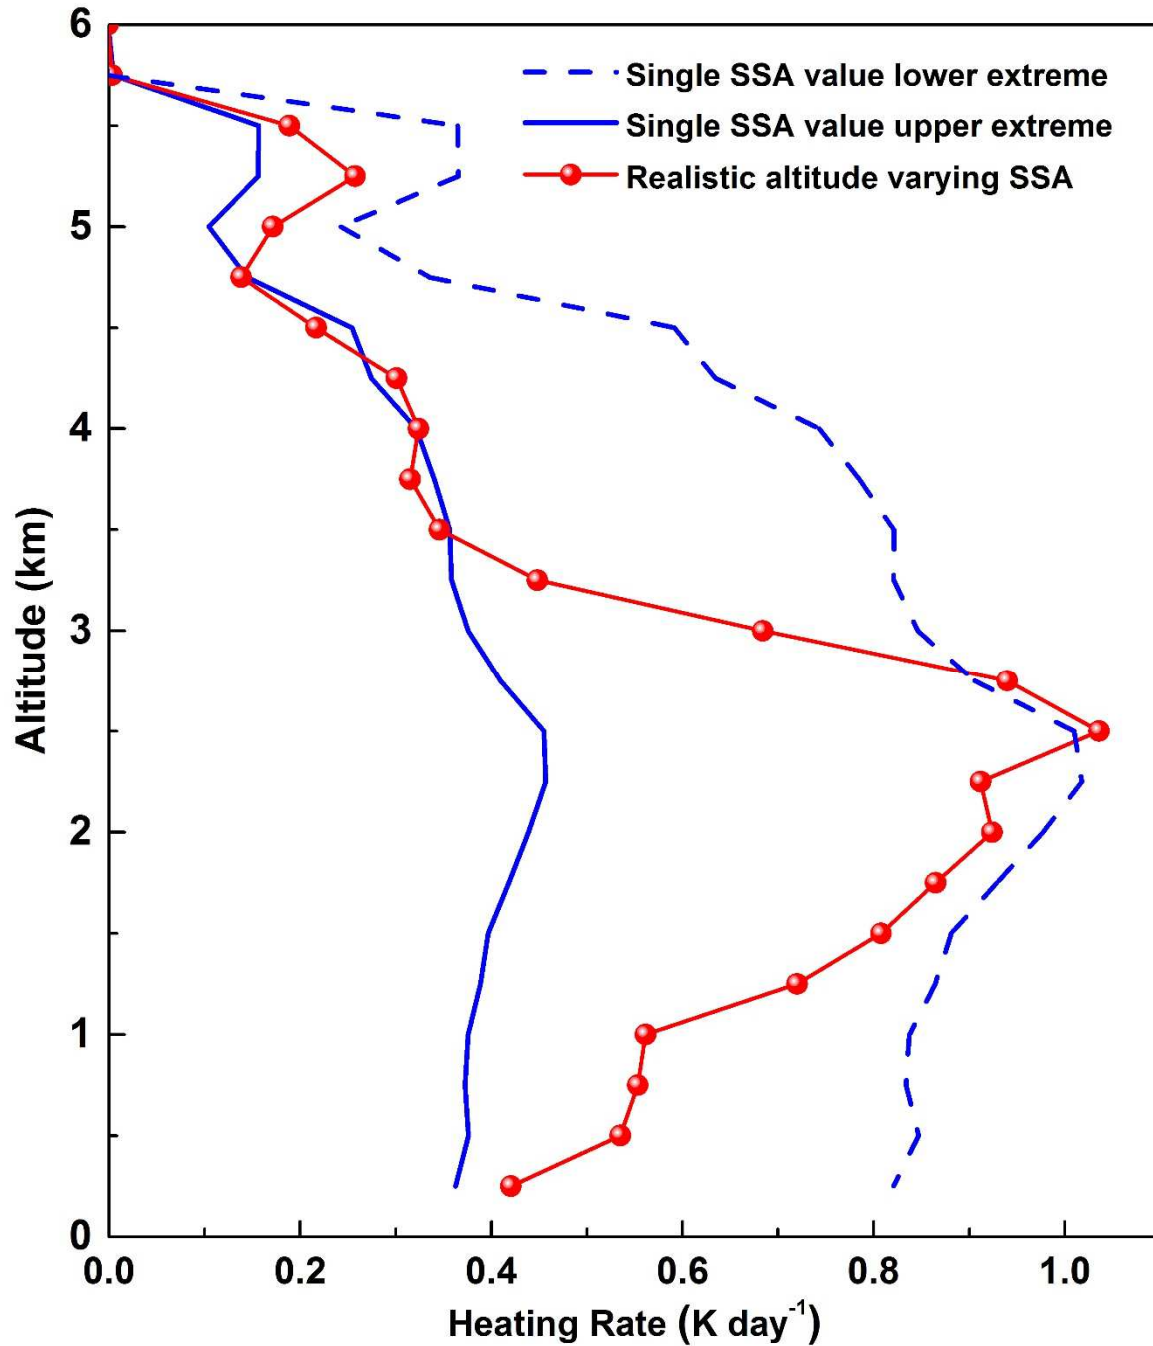

Figure S2. The realistic heating rate profile shown in Figure 9b has been reproduced here (red line). The SSA values in the profile vary between the two extreme values 0.95 and 0.87. To clearly demonstrate the effect of altitude resolved SSA on heating rate profiles, the heating rate profiles calculated for the same extinction profile, but with two single SSA values at the extremes (0.87 and 0.95) and also plotted. Though the position of the peak occurs around the same altitude, the peak heating rate as well as integrated heating rates differ significantly.
